# Supplementary material for: Anthocyanin Profile, Antioxidant, Anti-Inflammatory, and Antimicrobial against Foodborne Pathogens Activities of Purple Rice Cultivars in Northern Thailand
Source: MDPI journal article supplement (doi:10.3390/molecules26175234), 2021-08-29
Supplement: s1 [file s1]

# Anthocyanin Profile, Antioxidant, Anti-Inflammatory, and Antimicrobial against Foodborne Pathogens Activities of Purple Rice Cultivars in Northern Thailand

Thanawat Pattananandecha <sup>1,2</sup>, Sutasinee Apichai <sup>1,2,3</sup>, Sasithorn Sirilun <sup>2</sup>, Jakaphun Julsigival <sup>1,2</sup>, Kasirawat Sawangrat <sup>1,2</sup>, Fumihiko Ogata <sup>4</sup>, Naohito Kawasaki <sup>4,5</sup>, Busaban Sirithunyalug <sup>1,2,\*</sup> and Chalermpong Saenjum <sup>1,2,3,\*</sup>

<sup>1</sup> Cluster of Excellence on Biodiversity Based Economics and Society (B.BES-CMU), Chiang Mai University, Chiang Mai 50200, Thailand; thanawat.pdech@gmail.com (T.P.); sutasinee.apichai@gmail.com (S.A.); jakaphun@gmail.com (J.J.); kasirawat.s@cmu.ac.th (K.S.)

<sup>2</sup> Department of Pharmaceutical Sciences, Faculty of Pharmacy, Chiang Mai University, Chiang Mai 50200, Thailand; ssirilun@gmail.com

<sup>3</sup> Center of Excellence for Innovation in Analytical Science and Technology (I-ANALY-S-T), Faculty of Science, Chiang Mai University, Chiang Mai 50200, Thailand

<sup>4</sup> Faculty of Pharmacy, Kindai University, 3-4-1 Kowakae, Higashi-Osaka, Osaka 577-8502, Japan; ogata@phar.kindai.ac.jp (F.O.); kawasaki@phar.kindai.ac.jp (N.K.)

<sup>5</sup> Antiaging Center, Kindai University, 3-4-1 Kowakae, Higashi-Osaka, Osaka 577-8502, Japan

\* Correspondence: busaban.s@cmu.ac.th (B.S.); chalermpong.s@cmu.ac.th (C.S.); Tel.: +66-81-990-7971 (B.S.); +66-89-950-4227 (C.S.)

**Table S1.** Pearson correlation coefficients ( $r_2$ ) between assay for purple rice extracts.

|                                     |                    | TPC      | TFC      | Cyanidin 3-O-glucoside | Peonidin 3-O-glucoside | Delphinidin 3-O-glucoside |
|-------------------------------------|--------------------|----------|----------|------------------------|------------------------|---------------------------|
| Antioxidant activity                | ABTS•+             | 0.960**  | 0.935**  | 0.893**                | 0.826**                | 0.916**                   |
|                                     | Lipid peroxidation | −0.703** | −0.689** | −0.873**               | −0.637*                | −0.798**                  |
|                                     | O <sub>2</sub> •−  | −0.944** | −0.929** | −0.954**               | −0.760**               | −0.913**                  |
|                                     | NO                 | −0.786** | −0.765** | −0.923**               | −0.710**               | −0.838**                  |
| Pro-inflammatory protein inhibition | NO                 | −0.962** | 0.879**  | −0.868**               | −0.822**               | −0.762**                  |
|                                     | iNOS               | −0.940** | 0.904**  | −0.872**               | −0.802**               | −0.875**                  |

\*\* Correlation is significant at the 0.01 level (2-tailed).

\* Correlation is significant at the 0.05 level (2-tailed).
